# Supplementary material for: A single-cell atlas of lung homeostasis reveals dynamic changes during development and aging
Source: PubMed Central journal article supplement (PMC11001898; doi:10.1038/s42003-024-06111-x), 2024-04-08
Supplement: 42003_2024_6111_MOESM3_ESM.pdf [file 42003_2024_6111_MOESM3_ESM.pdf]

## **Description of Additional Supplementary Files**

**File name:** Supplementary Data 1

**Description:** Supplementary materials for unique gene sets of subclusters

**File name:** Supplementary Data 2

**Description:** Supplementary material for cell number of subclusters
